# Supplementary material for: A Multifunctional and Highly Adaptable Reporter System for CRISPR/Cas Editing
Source: MDPI journal article supplement (doi:10.3390/ijms24098271), 2023-05-05
Supplement: s1 [file s1]

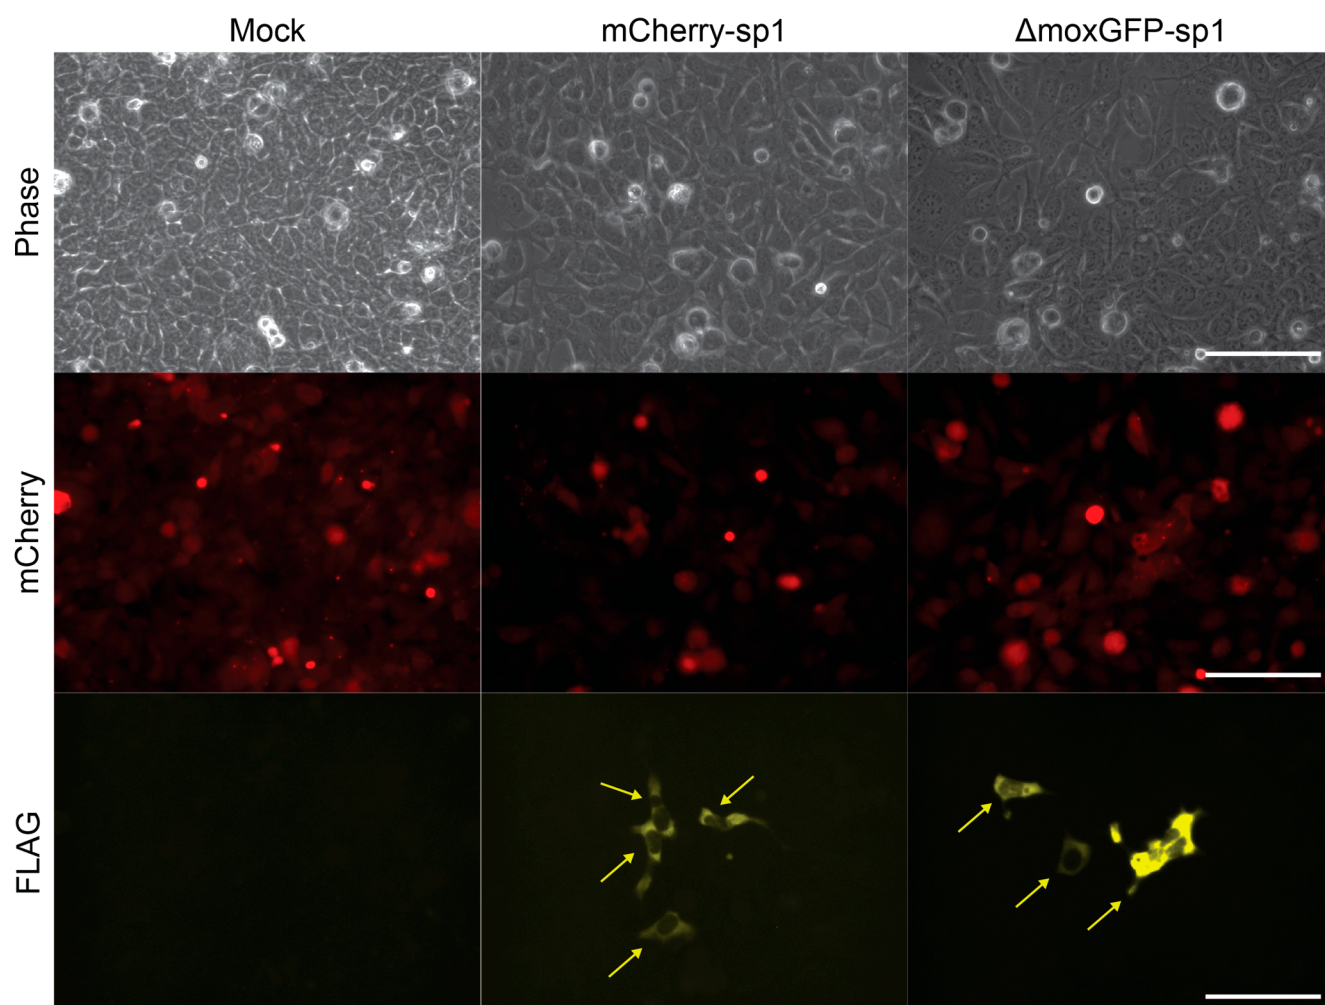

**Figure S1.** FLAG staining of edited BETLE-Pop. BETLE-Pop cells were transfected with spCas9 and gRNAs targeting either mCherry or  $\Delta$ moxGFP. Cells were stained using an anti-FLAG antibody and visualized via fluorescence microscopy; scale bars, 100  $\mu$ m.

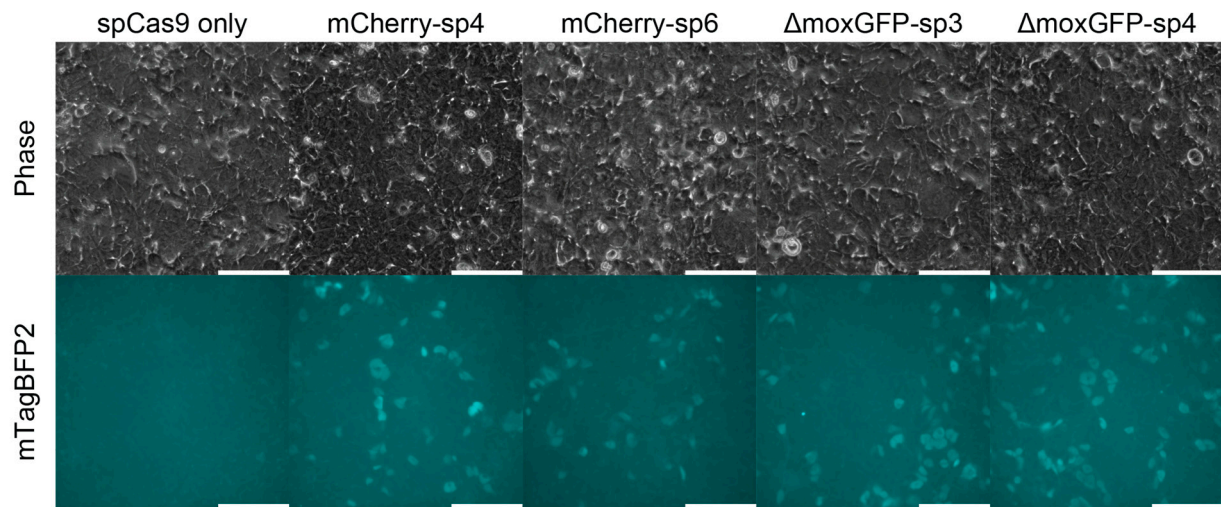

**Figure S2.** Spatial profile of edited BETLE-Pop expressing mTagBFP2. BETLE-Pop cells were transfected with SpCas9 and gRNAs targeting either mCherry or  $\Delta$ moxGFP. BETLE reporter editing and subsequent mTagBFP2 expression was monitored via fluorescence microscopy; scale bars, 100  $\mu$ m.

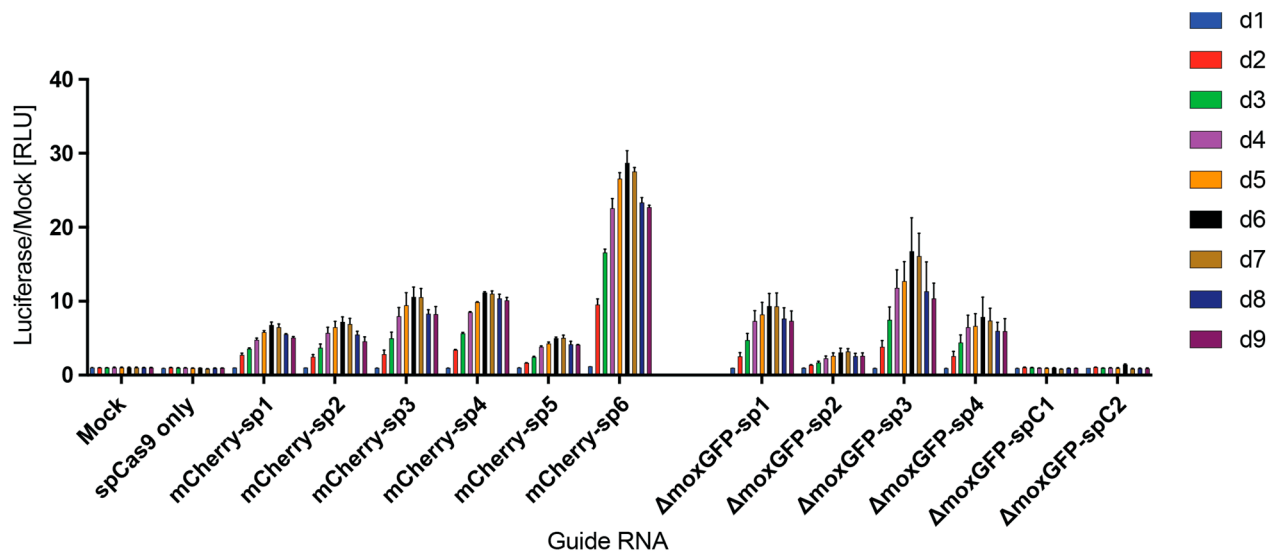

**Figure S3.** Editing-mediated NanoLuc luciferase expression kinetics. BETLE-Pop cells were transfected with SpCas9 and guide RNAs. Luciferase activity in the supernatant of transfected cells was measured every 24h for 9 days.

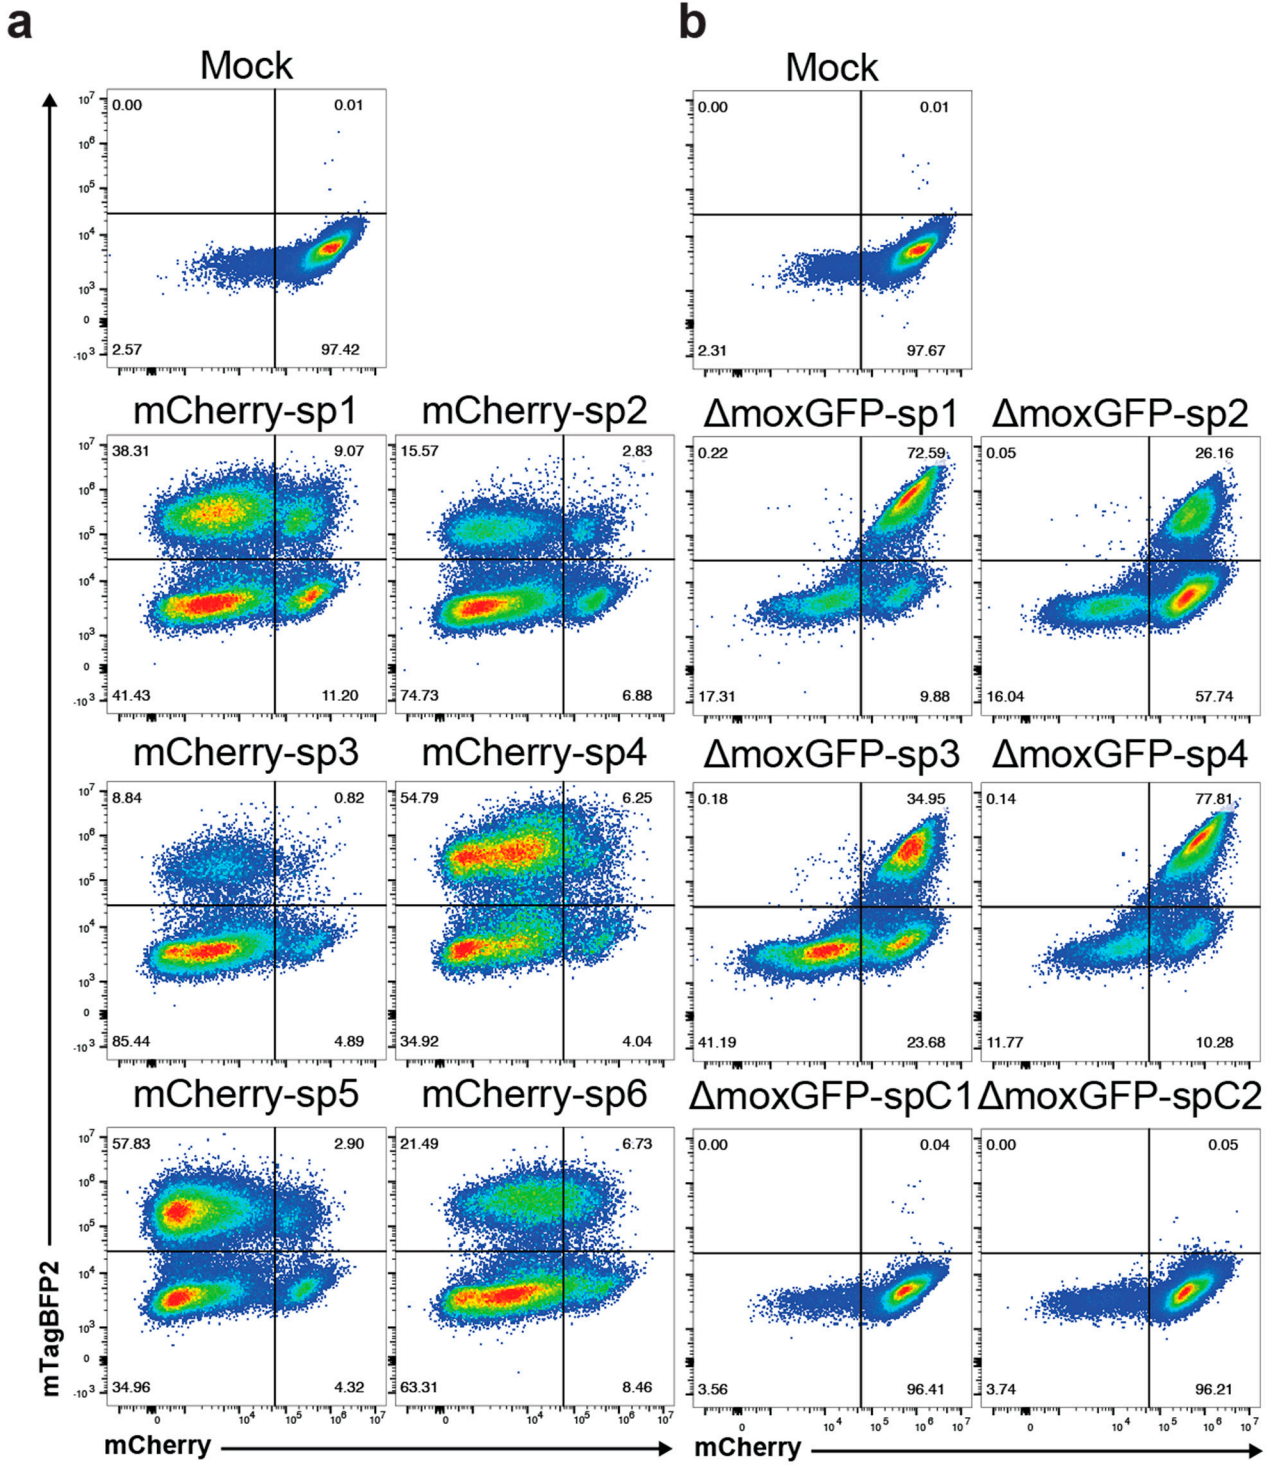

**Figure S4.** Puromycin selection of Cas9 edited cells. BETLE-Pop cells were transfected with SpCas9 and guide RNAs. Twenty-four hours later 100  $\mu$ g/mL puromycin was added to the culture media for 48 hours. BETLE reporter editing was analyzed via FACS analysis.

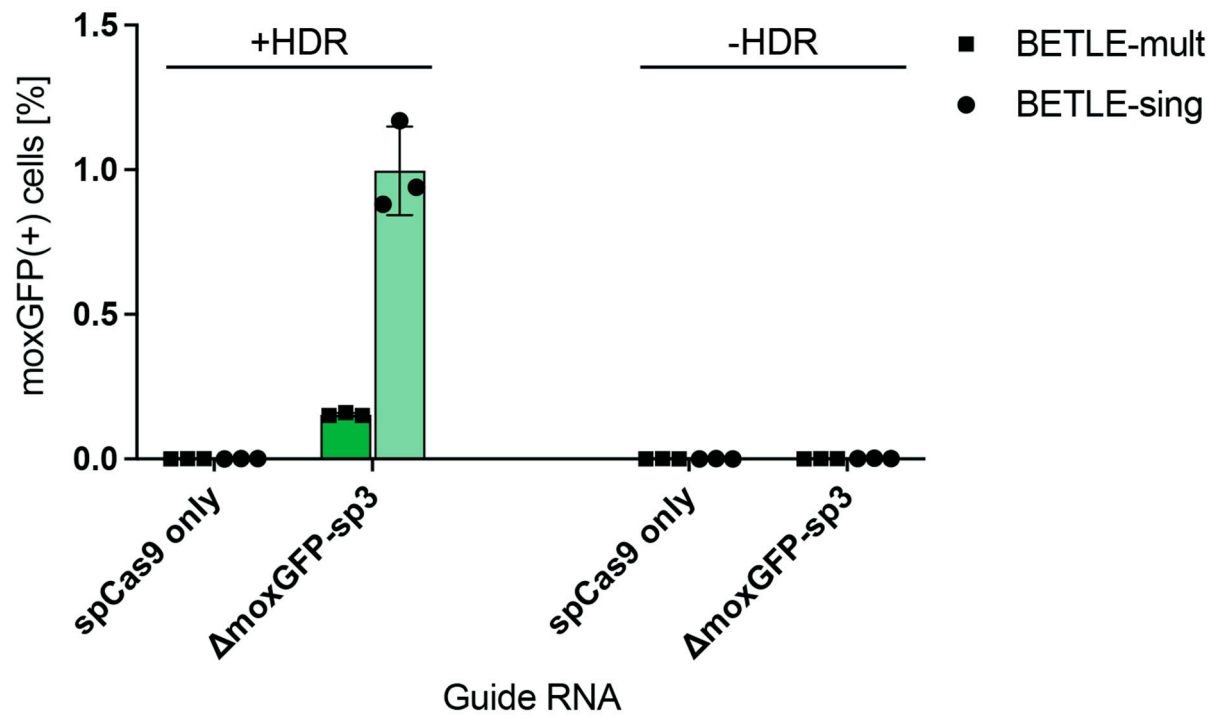

**Figure S5.** HDR efficiency in BETLE-mult and BETLE-sing cells. BETLE-mult and BETLE-sing cells were co-transfected with gRNA  $\Delta$ moxGFP-sp3 with and without HDR template and the percentage of moxGFP(+) cells assessed by flow cytometry.



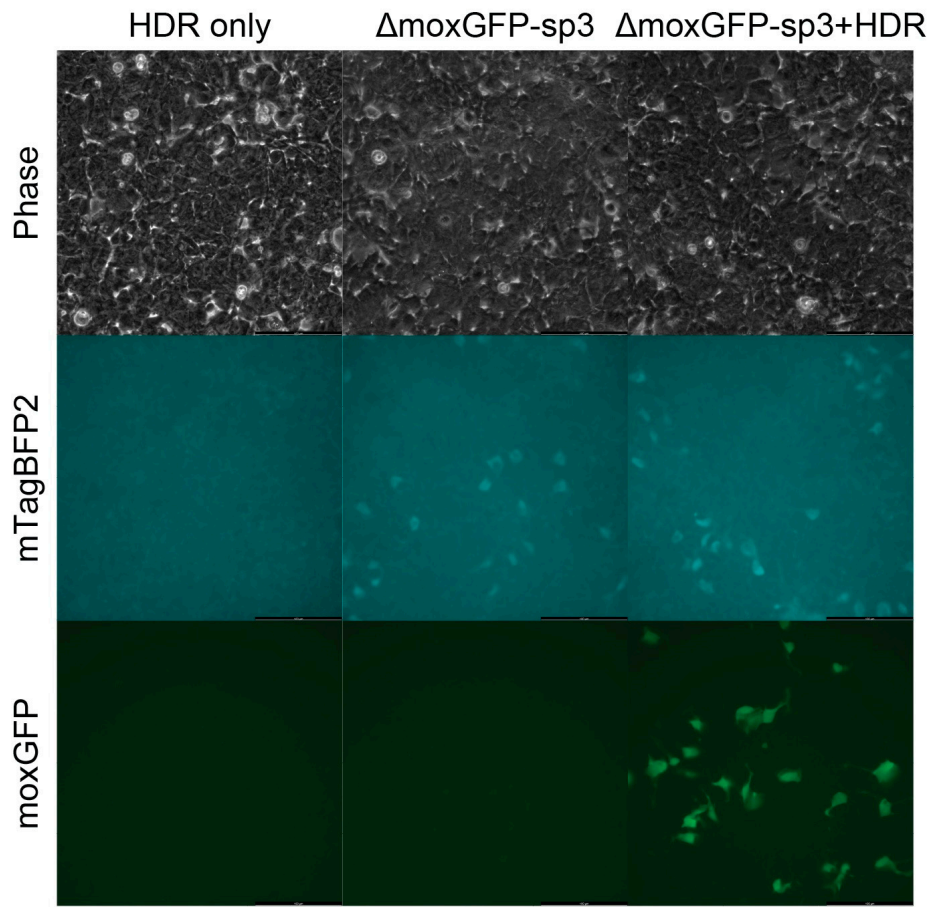

**Figure S6.** HDR-repair of  $\Delta$ moxGFP in BETLE-sing cells. BETLE-sing cells were co-transfected with gRNA  $\Delta$ moxGFP-sp3 with and without HDR template. Fluorescent reporter expression was monitored by fluorescence microscopy; scale bars, 100  $\mu$ m.

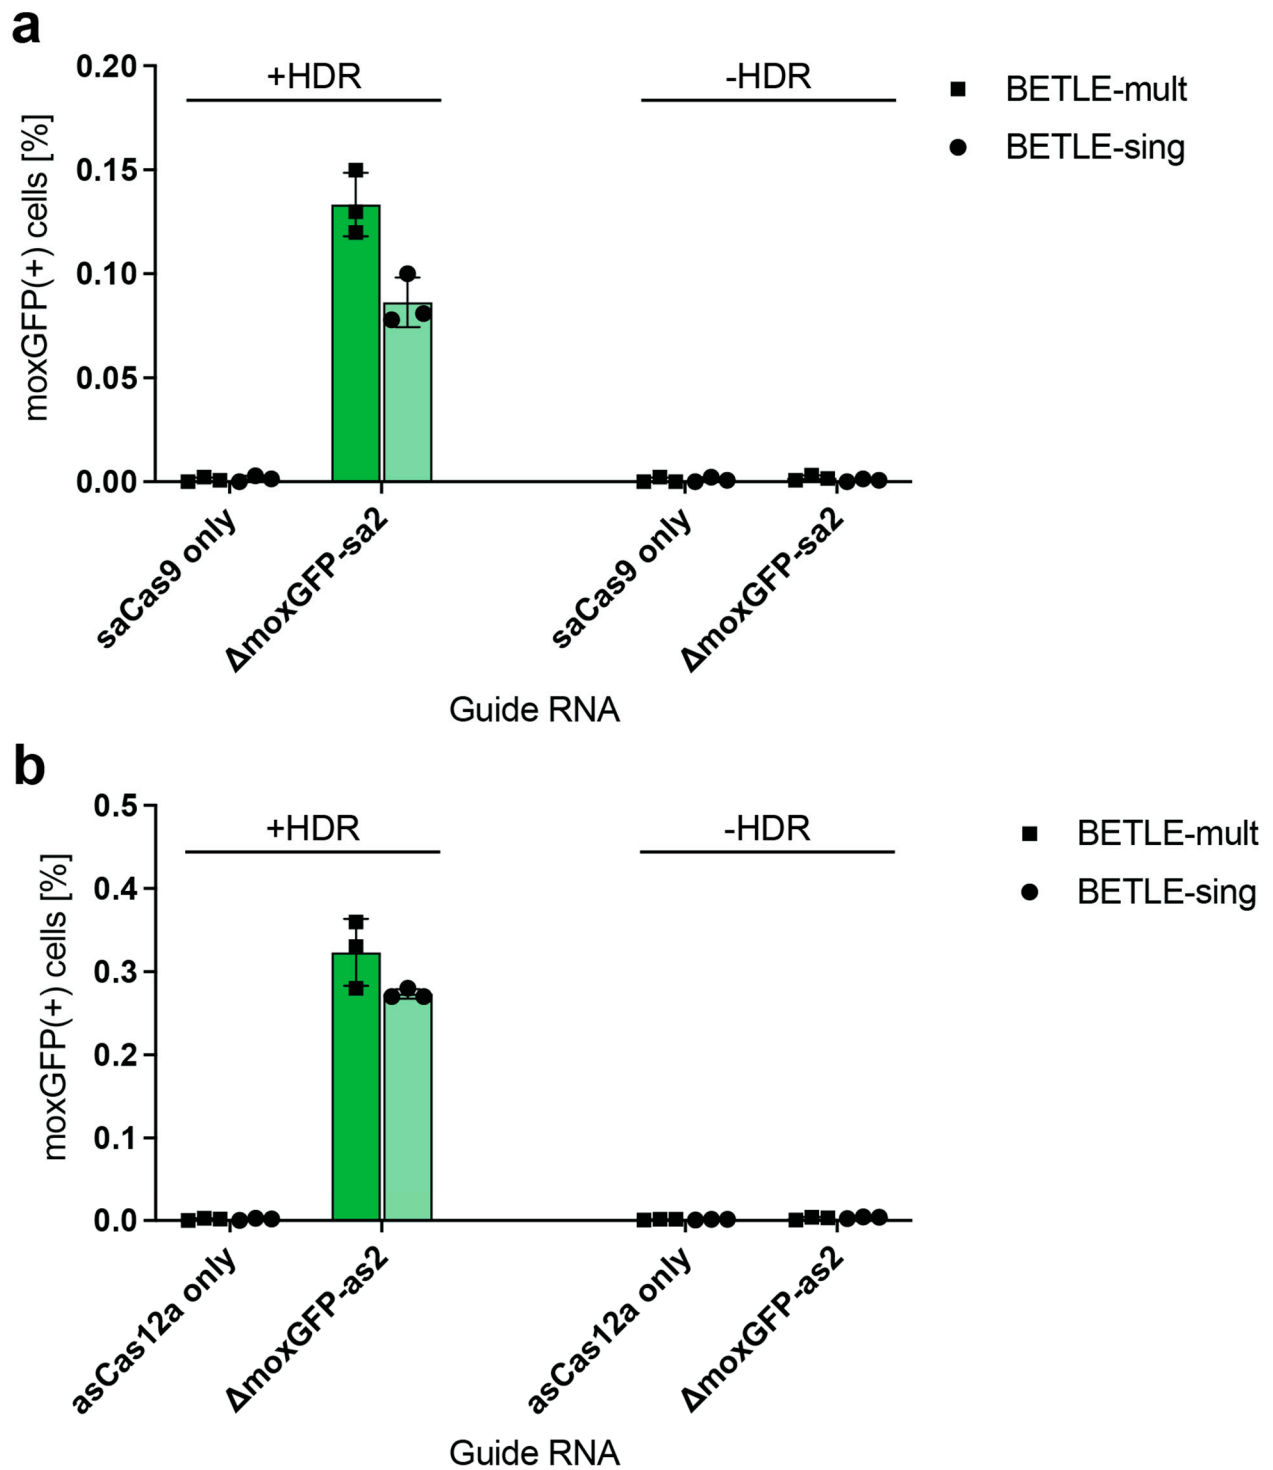

**Figure S7.** HDR efficiency in BETLE-mult and BETLE-sing cells. BETLE-mult and BETLE-sing cells were a) co-transfected with gRNA  $\Delta$ moxGFP-sa2 with and without HDR template or b) co-transfected with gRNA  $\Delta$ moxGFP-as2 with and without HDR template. The percentage of moxGFP(+) cells was assessed by flow cytometry.

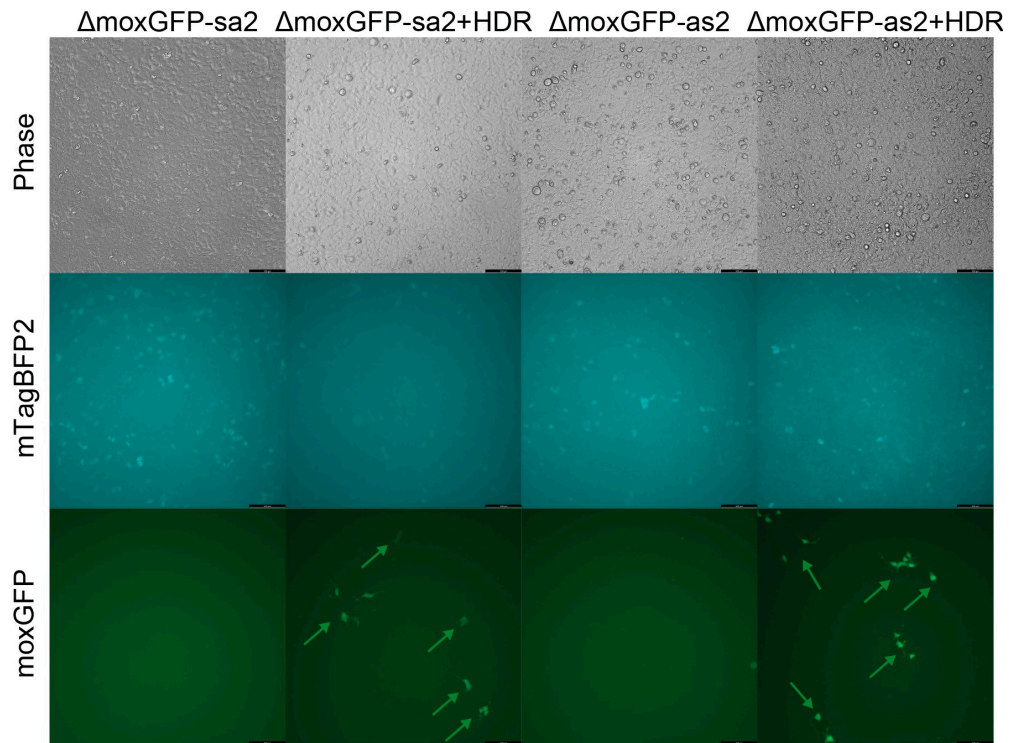

**Figure S8.** HDR-repair of  $\Delta\text{moxGFP}$  using saCas9 and asCas12a. BETLE-sing cells were transfected with saCas9 or asCas12a gRNAs with and without HDR template. Fluorescent reporter expression was monitored by fluorescence microscopy; scale bars, 100  $\mu\text{m}$ .



**Table S1.** Sequences of CRISPR-Cas gRNAs utilized in the study. Mismatches are marked in lower-case.

| Reporter site | Cas enzyme | Guide name           | Sequence                |
|---------------|------------|----------------------|-------------------------|
| A             | spCas9     | mCherry-sp1          | CTGTCCCCTCATTGATGTA     |
|               | spCas9     | mCherry-sp2          | TCAGTTCATGTACGGCTCCA    |
|               | spCas9     | mCherry-sp3          | GTCGGCGGGGTGCTTGACGT    |
| B             | spCas9     | mCherry-sp4          | CTCGGGGTACATCCGCTCGG    |
| C             | spCas9     | mCherry-sp5          | GCGTTCGTA CTGTTCCACGA   |
|               | spCas9     | mCherry-sp6          | GAACAGTACGAACGCGCCGA    |
| D             | spCas9     | $\Delta$ moxGFP-sp1  | TGGTCACCACCCTCACAAAG    |
|               | spCas9     | $\Delta$ moxGFP-sp2  | GTCGTGCCGCTTTGTGAGGG    |
|               | spCas9     | $\Delta$ moxGFP-sp3  | GAAGTCGTGCCGCTTTGTGA    |
|               | spCas9     | $\Delta$ moxGFP-sp4  | AGAAGTCGTGCCGCTTTGTG    |
|               | spCas9     | $\Delta$ moxGFP-spC1 | TTCAAGAGcGCCATGCCcGA    |
|               | spCas9     | $\Delta$ moxGFP-spC2 | TGGCGcTCTTGAAGAAGTCG    |
|               | saCas9     | $\Delta$ moxGFP-sa1  | GAAGAAGTCGTGCCGCTTTGT   |
|               | saCas9     | $\Delta$ moxGFP-sa2  | ACAAAGCGGCACGACTTCTTC   |
|               | saCas9     | $\Delta$ moxGFP-saC1 | GAcGAAtgCGTGCCGCTTTGT   |
|               | asCas12a   | $\Delta$ moxGFP-as1  | TGAGGGTGGTGACCAAAGTGGGC |
|               | asCas12a   | $\Delta$ moxGFP-as2  | GTCACCACCCTCACAAAGCGGCA |
|               | asCas12a   | $\Delta$ moxGFP-as3  | GACAGCTTGGACTGGGTGGACAG |
|               | asCas12a   | $\Delta$ moxGFP-asC1 | GTCtCCACCagCACAAAGCGGCA |

**Table S2.** Information on BETLE reporter integration sites for BETLE-mult and BETLE-sing.

| Sample     | Chromosome | Orientation | Position  | % of total reads |
|------------|------------|-------------|-----------|------------------|
| BETLE-Mult | 1          | minus       | 206276044 | 10.81            |
| BETLE-Mult | 1          | plus        | 225589572 | 29.73            |
| BETLE-Mult | 6          | minus       | 64647493  | 18.92            |
| BETLE-Mult | 8          | plus        | 17767389  | 10.81            |
| BETLE-Mult | 10         | plus        | 33291020  | 18.92            |
| BETLE-Sing | 20         | minus       | 53753872  | 100              |

**Table S3.** Primers used for esTaq-PCR.

| Name                      | Purpose                    | Sequence                                                                                                                                                                                                                                                                                                                                                                                                                                                                                                                                                                                                                                                                                                                                                                                                                                                                              |
|---------------------------|----------------------------|---------------------------------------------------------------------------------------------------------------------------------------------------------------------------------------------------------------------------------------------------------------------------------------------------------------------------------------------------------------------------------------------------------------------------------------------------------------------------------------------------------------------------------------------------------------------------------------------------------------------------------------------------------------------------------------------------------------------------------------------------------------------------------------------------------------------------------------------------------------------------------------|
| PB-3TR-Outer              | piggyBac Integration, PCR1 | GCGACGGATTTCGCGCTATTT                                                                                                                                                                                                                                                                                                                                                                                                                                                                                                                                                                                                                                                                                                                                                                                                                                                                 |
| PB-5TR-Outer              | piggyBac Integration, PCR1 | GACCGA-<br>TAAAACACATGCGTCA<br>AATGATACGGCGACCAC-<br>CGAGATCTACAC-<br>TCTTTCCCTACACGAC-<br>GCTCTTCCGATCTATTTCAAG<br>AATGCATGCGTCA<br>AATGATACGGCGACCAC-<br>CGAGATCTACAC-<br>TCTTTCCCTACACGAC-<br>GCTCTTCCGATCTCACATGAT<br>TATCTTTAACGTACGTCAC<br>CAAGCAGAAGACGGCAT-<br>ACGAGATGCAGCGTAG-<br>TCTCGTGGGCTCGGAGATG<br>CAAGCAGAAGACGGCAT-<br>ACGAGATCTGCG-<br>CATGTCTCGTGGGCTCGGA-<br>GATG<br>CAAGCAGAAGACGGCAT-<br>ACGAGATGAGCGCTAG-<br>TCTCGTGGGCTCGGAGATG<br>CAAGCAGAAGACGGCAT-<br>ACGAGATCGCTCAG-<br>TGTCTCGTGGGCTCGGA-<br>GATG<br>CAAGCAGAAGACGGCAT-<br>ACGA-<br>GATGTCTTAGGGTCTCGTGGG<br>CTCGGAGATG<br>CAAGCAGAAGACGGCAT-<br>ACGAGA-<br>TACTGATCGGTCTCGTGGGCT<br>CGGAGATG<br>CAAGCAGAAGACGGCAT-<br>ACGAGA-<br>TACTGATCGGTCTCGTGGGCT<br>CGGAGATG<br>CAAGCAGAAGACGGCAT-<br>ACGAGATTAGCTGCAG-<br>TCTCGTGGGCTCGGAGATG<br>CAAGCAGAAGACGGCAT-<br>ACGAGATGACGTCGAG-<br>TCTCGTGGGCTCGGAGATG |
| PB-3TR-Inner-P5-TruSeq-R1 | piggyBac Integration, PCR2 |                                                                                                                                                                                                                                                                                                                                                                                                                                                                                                                                                                                                                                                                                                                                                                                                                                                                                       |
| PB-5TR-Inner-P5-TruSeq-R1 | piggyBac Integration, PCR2 |                                                                                                                                                                                                                                                                                                                                                                                                                                                                                                                                                                                                                                                                                                                                                                                                                                                                                       |
| P7-N721-NexteraR2         | Nested/Index PCR           |                                                                                                                                                                                                                                                                                                                                                                                                                                                                                                                                                                                                                                                                                                                                                                                                                                                                                       |
| P7-N722-NexteraR2         | Nested/Index PCR           |                                                                                                                                                                                                                                                                                                                                                                                                                                                                                                                                                                                                                                                                                                                                                                                                                                                                                       |
| P7-N723-NexteraR2         | Nested/Index PCR           |                                                                                                                                                                                                                                                                                                                                                                                                                                                                                                                                                                                                                                                                                                                                                                                                                                                                                       |
| P7-N724-NexteraR2         | Nested/Index PCR           |                                                                                                                                                                                                                                                                                                                                                                                                                                                                                                                                                                                                                                                                                                                                                                                                                                                                                       |
| P7-N725-NexteraR2         | Nested/Index PCR           |                                                                                                                                                                                                                                                                                                                                                                                                                                                                                                                                                                                                                                                                                                                                                                                                                                                                                       |
| P7-N726-NexteraR2         | Nested/Index PCR           |                                                                                                                                                                                                                                                                                                                                                                                                                                                                                                                                                                                                                                                                                                                                                                                                                                                                                       |
| P7-N727-NexteraR2         | Nested/Index PCR           |                                                                                                                                                                                                                                                                                                                                                                                                                                                                                                                                                                                                                                                                                                                                                                                                                                                                                       |
| P7-N728-NexteraR2         | Nested/Index PCR           |                                                                                                                                                                                                                                                                                                                                                                                                                                                                                                                                                                                                                                                                                                                                                                                                                                                                                       |
| P7-N729-NexteraR2         | Nested/Index PCR           |                                                                                                                                                                                                                                                                                                                                                                                                                                                                                                                                                                                                                                                                                                                                                                                                                                                                                       |
